# Supplementary material
Source: publisher site journal article supplement (https://www.dovepress.com/article/553523)
Supplement: Supplementary file 1 [file 553523_Supplementary%20document1.docx]

Supplementary document 1：The 20 H. pylori-related questions we collected

(The English text is a translated version of the Chinese text.)

一、幽门螺旋杆菌概念症状相关(Helicobacter pylori concept - Symptom-related)

1、 幽门螺旋杆菌是什么？(What is Helicobacter pylori?)

2、 感染幽门螺旋杆菌会有什么症状？(What symptoms will occur if one is infected with Helicobacter pylori?)

3、 我有口臭，是不是得了幽门螺旋杆菌？(I have bad breath. Could it be that I have contracted Helicobacter pylori?)

4、 我胃完全没有不舒服，肯定没有感染幽门螺旋杆菌吧？(My stomach doesn't feel any discomfort at all. So, I'm sure I haven't contracted Helicobacter pylori, right?)

二、幽门螺旋杆菌诊断相关(Diagnosis related)

1、怎么检查是否感染了幽门螺旋杆菌？(How can one check if they are infected with Helicobacter pylori?)

2、我抽血查出来幽门螺旋杆菌抗体阳性，为什么还需要呼气检查呢？(I had my blood tested and it showed that I have a positive result for Helicobacter pylori antibodies. Why do I still need to undergo the breath test?)

3、查幽门螺旋杆菌是吹气准还是抽血准确？(Is it more accurate to test for Helicobacter pylori by blowing air into a tube or by drawing blood?)

4、我根除过幽门螺旋杆菌，体检抽血检查还是阳性的，是没有治好吗？(I have eradicated Helicobacter pylori, but the blood test during the physical examination still showed a positive result. Was the treatment not successful?)

5、我做了胃镜，病理提示幽门螺旋杆菌阴性，为什么还要让我吹气呢？(I had a gastroscopy, and the pathology result indicated that there was no Helicobacter pylori. Why did they still make me undergo the breath test?)

三、幽门螺旋杆菌治疗相关(Treatment related)

1、得了幽门螺旋杆菌必须要根除吗？(Is it necessary to receive treatment for being infected with Helicobacter pylori?)

2、幽门螺旋杆菌怎么治疗呢？(How is Helicobacter pylori infection treated?)

3、幽门螺旋杆菌能根治吗？(Can Helicobacter pylori be completely cured?)

4、我有幽门螺旋杆菌，我的家人是不是也需要跟我一起治疗？(I have an infection of Helicobacter pylori. Should my family members also receive treatment along with me?)

5、治疗幽门螺旋杆菌有什么副作用吗？(Are there any side effects from treating Helicobacter pylori?)

6、我治疗幽门螺旋杆菌失败了怎么办？(What should I do if my treatment for Helicobacter pylori fails?)

四、幽门螺旋杆菌传播预防相关(Prevention and transmission related)

1、幽门螺旋杆菌治好后还会复发吗？(Will Helicobacter pylori recur even after it has been cured?)

2、我得了幽门螺旋杆菌，我的孩子需要检查吗？(I have infected by Helicobacter pylori. Does my child need to be tested as well?)

3、我是怎么感染的幽门螺旋杆菌呢？(How did I get infected with Helicobacter pylori?)

4、我得了幽门螺旋杆菌，我还能跟家人一起吃饭吗？(Can I still have meals with my family if I get infected with Helicobacter pylori?)

5、我怎么能预防幽门螺旋杆菌呢？ (How can I prevent the Helicobacter pylori infection?)
